# Supplementary material
Source: Springer Nature journal article supplement (https://www.springermedizin.de/resource/supplementary/12874_2011_898_MOESM2_ESM.pdf/9432964)

Enrollment

6 Months

12 Months

18 Months

24 Months

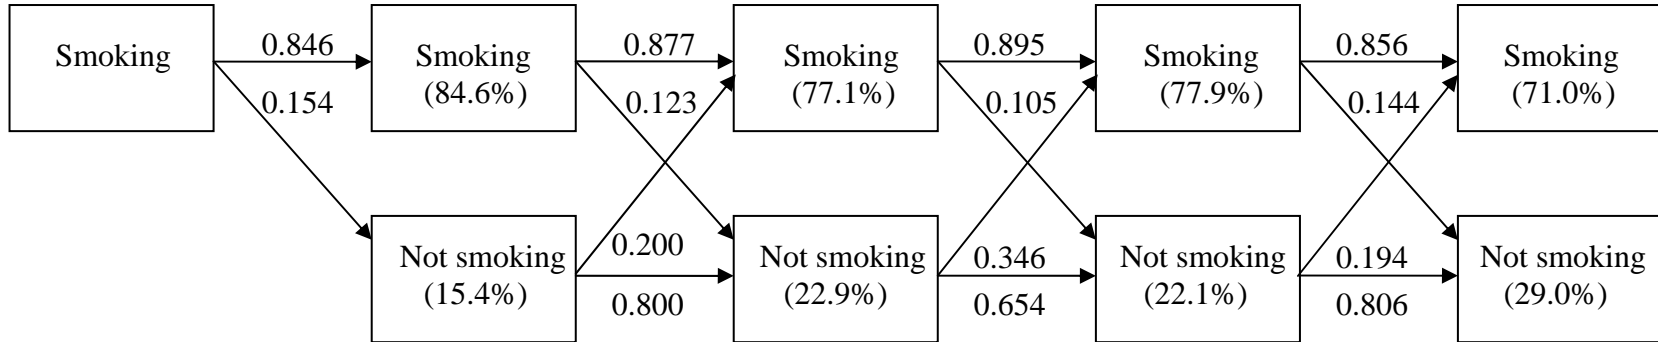

Supplement: MOESM2 [file 9432964]
